# Supplementary material for: Analyzing Lower Limb Dynamics in Human Gait Using Average Value-Based Technique
Source: Hindawi journal article supplement (doi:10.1155/2024/7344011), 2024-04-25
Supplement: f1 [file 7344011.f1.pdf]

### Healthy person data

| Frame No | Frame duration | Knee left | Knee Right | Hip Left | Hip Right | Ankle left | Ankle right |
|----------|----------------|-----------|------------|----------|-----------|------------|-------------|
| 1        | 0.025          | 180       | 158        | 155      | 178       | 92.2619    | 105.9524    |
| 2        | 0.05           | 180       | 125        | 155      | 175       | 92.2619    | 104.1667    |
| 3        | 0.075          | 180       | 150        | 155      | 172       | 92.2619    | 102.381     |
| 4        | 0.1            | 180       | 145        | 155      | 168       | 92.2619    | 100         |
| 5        | 0.125          | 180       | 142        | 155      | 165       | 92.2619    | 98.21429    |
| 6        | 0.15           | 180       | 132        | 155      | 163       | 92.2619    | 97.02381    |
| 7        | 0.175          | 180       | 128        | 155      | 161       | 92.2619    | 95.83333    |
| 8        | 0.2            | 180       | 128        | 155      | 158       | 92.2619    | 94.04762    |
| 9        | 0.225          | 180       | 126        | 155      | 157       | 92.2619    | 93.45238    |
| 10       | 0.25           | 180       | 125        | 155      | 156       | 92.2619    | 92.85714    |
| 11       | 0.275          | 180       | 128        | 155      | 155       | 92.2619    | 92.2619     |
| 12       | 0.3            | 180       | 130        | 156      | 155       | 92.85714   | 92.2619     |
| 13       | 0.325          | 180       | 135        | 157      | 155       | 93.45238   | 92.2619     |
| 14       | 0.35           | 180       | 135        | 158      | 155       | 94.04762   | 92.2619     |
| 15       | 0.375          | 180       | 142        | 161      | 155       | 95.83333   | 92.2619     |
| 16       | 0.4            | 180       | 152        | 163      | 155       | 97.02381   | 92.2619     |
| 17       | 0.425          | 180       | 158        | 165      | 155       | 98.21429   | 92.2619     |
| 18       | 0.45           | 180       | 158        | 168      | 155       | 100        | 92.2619     |
| 19       | 0.475          | 180       | 165        | 172      | 155       | 102.381    | 92.2619     |
| 20       | 0.5            | 180       | 174        | 175      | 155       | 104.1667   | 92.2619     |
| 21       | 0.525          | 180       | 175        | 178      | 155       | 105.9524   | 92.2619     |
| 22       | 0.55           | 180       | 180        | 180      | 155       | 107.1429   | 92.2619     |
| 23       | 0.575          | 180       | 180        | 180      | 155       | 107.1429   | 92.2619     |
| 24       | 0.6            | 180       | 180        | 180      | 155       | 107.1429   | 92.2619     |
| 25       | 0.625          | 180       | 180        | 180      | 155       | 107.1429   | 92.2619     |
| 26       | 0.65           | 180       | 180        | 180      | 155       | 107.1429   | 92.2619     |
| 27       | 0.675          | 180       | 180        | 180      | 155       | 107.1429   | 92.2619     |
| 28       | 0.7            | 180       | 180        | 180      | 155       | 107.1429   | 92.2619     |
| 29       | 0.725          | 180       | 180        | 180      | 155       | 107.1429   | 92.2619     |
| 30       | 0.75           | 180       | 180        | 180      | 155       | 107.1429   | 92.2619     |
| 31       | 0.775          | 180       | 180        | 180      | 155       | 107.1429   | 92.2619     |
| 32       | 0.8            | 180       | 180        | 180      | 155       | 107.1429   | 92.2619     |
| 33       | 0.825          | 158       | 180        | 178      | 156       | 105.9524   | 92.85714    |
| 34       | 0.85           | 155       | 180        | 175      | 157       | 104.1667   | 93.45238    |
| 35       | 0.875          | 150       | 180        | 172      | 158       | 102.381    | 94.04762    |
| 36       | 0.9            | 145       | 180        | 168      | 161       | 100        | 95.83333    |
| 37       | 0.925          | 142       | 180        | 165      | 163       | 98.21429   | 97.02381    |
| 38       | 0.95           | 132       | 180        | 163      | 165       | 97.02381   | 98.21429    |
| 39       | 0.975          | 128       | 180        | 161      | 168       | 95.83333   | 100         |
| 40       | 1              | 128       | 180        | 158      | 172       | 94.04762   | 102.381     |
| 41       | 1.025          | 126       | 180        | 157      | 175       | 93.45238   | 104.1667    |
| 42       | 1.05           | 125       | 180        | 156      | 178       | 92.85714   | 105.9524    |
| 43       | 1.075          | 128       | 180        | 155      | 180       | 92.2619    | 107.1429    |

|    |       |     |     |     |     |          |          |
|----|-------|-----|-----|-----|-----|----------|----------|
| 44 | 1.1   | 130 | 180 | 155 | 180 | 92.2619  | 107.1429 |
| 45 | 1.125 | 135 | 180 | 155 | 180 | 92.2619  | 107.1429 |
| 46 | 1.15  | 135 | 180 | 155 | 180 | 92.2619  | 107.1429 |
| 47 | 1.175 | 142 | 180 | 155 | 180 | 92.2619  | 107.1429 |
| 48 | 1.2   | 152 | 180 | 155 | 180 | 92.2619  | 107.1429 |
| 49 | 1.225 | 158 | 180 | 155 | 180 | 92.2619  | 107.1429 |
| 50 | 1.25  | 158 | 180 | 155 | 180 | 92.2619  | 107.1429 |
| 51 | 1.275 | 165 | 180 | 155 | 180 | 92.2619  | 107.1429 |
| 52 | 1.3   | 174 | 180 | 155 | 180 | 92.2619  | 107.1429 |
| 53 | 1.325 | 175 | 180 | 155 | 180 | 92.2619  | 107.1429 |
| 54 | 1.35  | 170 | 180 | 155 | 178 | 92.2619  | 105.9524 |
| 55 | 1.375 | 174 | 180 | 155 | 175 | 92.2619  | 104.1667 |
| 56 | 1.4   | 178 | 180 | 155 | 172 | 92.2619  | 102.381  |
| 57 | 1.425 | 180 | 178 | 155 | 168 | 92.2619  | 100      |
| 58 | 1.45  | 180 | 174 | 155 | 165 | 92.2619  | 98.21429 |
| 59 | 1.475 | 180 | 170 | 155 | 163 | 92.2619  | 97.02381 |
| 60 | 1.5   | 180 | 166 | 155 | 161 | 92.2619  | 95.83333 |
| 61 | 1.525 | 180 | 162 | 155 | 158 | 92.2619  | 94.04762 |
| 62 | 1.55  | 180 | 158 | 155 | 157 | 92.2619  | 93.45238 |
| 63 | 1.575 | 180 | 154 | 155 | 156 | 92.2619  | 92.85714 |
| 64 | 1.6   | 180 | 150 | 155 | 155 | 92.2619  | 92.2619  |
| 65 | 1.625 | 180 | 146 | 156 | 155 | 92.85714 | 92.2619  |
| 66 | 1.65  | 180 | 142 | 157 | 155 | 93.45238 | 92.2619  |
| 67 | 1.675 | 180 | 138 | 158 | 155 | 94.04762 | 92.2619  |
| 68 | 1.7   | 180 | 134 | 161 | 155 | 95.83333 | 92.2619  |
| 69 | 1.725 | 180 | 130 | 163 | 155 | 97.02381 | 92.2619  |
| 70 | 1.75  | 180 | 134 | 165 | 155 | 98.21429 | 92.2619  |
| 71 | 1.775 | 180 | 138 | 168 | 155 | 100      | 92.2619  |
| 72 | 1.8   | 180 | 142 | 172 | 155 | 102.381  | 92.2619  |
| 73 | 1.825 | 180 | 146 | 175 | 155 | 104.1667 | 92.2619  |
| 74 | 1.85  | 180 | 150 | 178 | 155 | 105.9524 | 92.2619  |
| 75 | 1.875 | 180 | 154 | 180 | 155 | 107.1429 | 92.2619  |
| 76 | 1.9   | 180 | 158 | 180 | 155 | 107.1429 | 92.2619  |
| 77 | 1.925 | 180 | 162 | 180 | 155 | 107.1429 | 92.2619  |
| 78 | 1.95  | 180 | 166 | 180 | 155 | 107.1429 | 92.2619  |
| 79 | 1.975 | 180 | 170 | 180 | 155 | 107.1429 | 92.2619  |
| 80 | 2     | 180 | 174 | 180 | 155 | 107.1429 | 92.2619  |
| 81 | 2.025 | 180 | 178 | 180 | 155 | 107.1429 | 92.2619  |
| 82 | 2.05  | 180 | 180 | 180 | 155 | 107.1429 | 92.2619  |
| 83 | 2.075 | 180 | 180 | 180 | 155 | 107.1429 | 92.2619  |
| 84 | 2.1   | 180 | 180 | 180 | 155 | 107.1429 | 92.2619  |
| 85 | 2.125 | 180 | 180 | 180 | 155 | 107.1429 | 92.2619  |
| 86 | 2.15  | 180 | 180 | 178 | 156 | 105.9524 | 92.85714 |
| 87 | 2.175 | 180 | 180 | 175 | 157 | 104.1667 | 93.45238 |
| 88 | 2.2   | 178 | 180 | 172 | 158 | 102.381  | 94.04762 |
| 89 | 2.225 | 174 | 180 | 168 | 161 | 100      | 95.83333 |

|     |       |     |     |     |     |          |          |
|-----|-------|-----|-----|-----|-----|----------|----------|
| 90  | 2.25  | 170 | 180 | 165 | 163 | 98.21429 | 97.02381 |
| 91  | 2.275 | 166 | 180 | 163 | 165 | 97.02381 | 98.21429 |
| 92  | 2.3   | 162 | 180 | 161 | 168 | 95.83333 | 100      |
| 93  | 2.325 | 158 | 180 | 158 | 172 | 94.04762 | 102.381  |
| 94  | 2.35  | 154 | 180 | 157 | 175 | 93.45238 | 104.1667 |
| 95  | 2.375 | 150 | 180 | 156 | 178 | 92.85714 | 105.9524 |
| 96  | 2.4   | 146 | 180 | 155 | 180 | 92.2619  | 107.1429 |
| 97  | 2.425 | 142 | 180 | 155 | 180 | 92.2619  | 107.1429 |
| 98  | 2.45  | 138 | 180 | 155 | 180 | 92.2619  | 107.1429 |
| 99  | 2.475 | 134 | 180 | 155 | 180 | 92.2619  | 107.1429 |
| 100 | 2.5   | 130 | 180 | 155 | 180 | 92.2619  | 107.1429 |
| 101 | 2.525 | 134 | 180 | 155 | 180 | 92.2619  | 107.1429 |
| 102 | 2.55  | 138 | 180 | 155 | 180 | 92.2619  | 107.1429 |
| 103 | 2.575 | 142 | 180 | 155 | 180 | 92.2619  | 107.1429 |
| 104 | 2.6   | 146 | 180 | 155 | 180 | 92.2619  | 107.1429 |
| 105 | 2.625 | 150 | 180 | 155 | 180 | 92.2619  | 107.1429 |
| 106 | 2.65  | 154 | 180 | 155 | 180 | 92.2619  | 107.1429 |
| 107 | 2.675 | 158 | 180 | 155 | 178 | 92.2619  | 105.9524 |
| 108 | 2.7   | 162 | 180 | 155 | 175 | 92.2619  | 104.1667 |
| 109 | 2.725 | 166 | 180 | 155 | 172 | 92.2619  | 102.381  |
| 110 | 2.75  | 170 | 180 | 155 | 168 | 92.2619  | 100      |
| 111 | 2.775 | 174 | 180 | 155 | 165 | 92.2619  | 98.21429 |
| 112 | 2.8   | 178 | 180 | 155 | 163 | 92.2619  | 97.02381 |
| 113 | 2.825 | 180 | 178 | 155 | 161 | 92.2619  | 95.83333 |
| 114 | 2.85  | 180 | 174 | 155 | 158 | 92.2619  | 94.04762 |
| 115 | 2.875 | 180 | 170 | 155 | 157 | 92.2619  | 93.45238 |
| 116 | 2.9   | 180 | 166 | 155 | 156 | 92.2619  | 92.85714 |
| 117 | 2.925 | 180 | 162 | 155 | 155 | 92.2619  | 92.2619  |
| 118 | 2.95  | 180 | 158 | 156 | 155 | 92.85714 | 92.2619  |
| 119 | 2.975 | 180 | 154 | 157 | 155 | 93.45238 | 92.2619  |
| 120 | 3     | 180 | 150 | 158 | 155 | 94.04762 | 92.2619  |
| 121 | 3.025 | 180 | 135 | 161 | 155 | 95.83333 | 92.2619  |
| 122 | 3.05  | 180 | 138 | 163 | 155 | 97.02381 | 92.2619  |
| 123 | 3.075 | 180 | 148 | 165 | 155 | 98.21429 | 92.2619  |
| 124 | 3.1   | 180 | 155 | 168 | 155 | 100      | 92.2619  |
| 125 | 3.125 | 180 | 162 | 172 | 155 | 102.381  | 92.2619  |
| 126 | 3.15  | 180 | 171 | 175 | 155 | 104.1667 | 92.2619  |
| 127 | 3.175 | 180 | 176 | 178 | 155 | 105.9524 | 92.2619  |
| 128 | 3.2   | 180 | 180 | 180 | 155 | 107.1429 | 92.2619  |
| 129 | 3.225 | 180 | 180 | 180 | 155 | 107.1429 | 92.2619  |
| 130 | 3.25  | 180 | 180 | 180 | 155 | 107.1429 | 92.2619  |
| 131 | 3.275 | 180 | 180 | 180 | 155 | 107.1429 | 92.2619  |
| 132 | 3.3   | 180 | 180 | 180 | 155 | 107.1429 | 92.2619  |
| 133 | 3.325 | 180 | 180 | 180 | 155 | 107.1429 | 92.2619  |
| 134 | 3.35  | 180 | 180 | 180 | 155 | 107.1429 | 92.2619  |
| 135 | 3.375 | 180 | 180 | 180 | 155 | 107.1429 | 92.2619  |

|     |       |     |     |     |     |          |          |
|-----|-------|-----|-----|-----|-----|----------|----------|
| 136 | 3.4   | 180 | 180 | 180 | 155 | 107.1429 | 92.2619  |
| 137 | 3.425 | 180 | 180 | 180 | 155 | 107.1429 | 92.2619  |
| 138 | 3.45  | 180 | 180 | 180 | 155 | 107.1429 | 92.2619  |
| 139 | 3.475 | 158 | 180 | 178 | 156 | 105.9524 | 92.85714 |
| 140 | 3.5   | 157 | 180 | 175 | 157 | 104.1667 | 93.45238 |
| 141 | 3.525 | 151 | 180 | 172 | 158 | 102.381  | 94.04762 |
| 142 | 3.55  | 135 | 180 | 168 | 161 | 100      | 95.83333 |
| 143 | 3.575 | 130 | 180 | 165 | 163 | 98.21429 | 97.02381 |
| 144 | 3.6   | 125 | 180 | 163 | 165 | 97.02381 | 98.21429 |
| 145 | 3.625 | 123 | 180 | 161 | 168 | 95.83333 | 100      |
| 146 | 3.65  | 123 | 180 | 158 | 172 | 94.04762 | 102.381  |
| 147 | 3.675 | 123 | 180 | 157 | 175 | 93.45238 | 104.1667 |
| 148 | 3.7   | 123 | 180 | 156 | 178 | 92.85714 | 105.9524 |
| 149 | 3.725 | 123 | 180 | 155 | 180 | 92.2619  | 107.1429 |
| 150 | 3.75  | 124 | 180 | 155 | 180 | 92.2619  | 107.1429 |
| 151 | 3.775 | 128 | 180 | 155 | 180 | 92.2619  | 107.1429 |
| 152 | 3.8   | 135 | 180 | 155 | 180 | 92.2619  | 107.1429 |
| 153 | 3.825 | 135 | 180 | 155 | 180 | 92.2619  | 107.1429 |
| 154 | 3.85  | 138 | 180 | 155 | 180 | 92.2619  | 107.1429 |
| 155 | 3.875 | 148 | 180 | 155 | 180 | 92.2619  | 107.1429 |
| 156 | 3.9   | 155 | 180 | 155 | 180 | 92.2619  | 107.1429 |
| 157 | 3.925 | 162 | 180 | 155 | 180 | 92.2619  | 107.1429 |
| 158 | 3.95  | 171 | 180 | 155 | 180 | 92.2619  | 107.1429 |
| 159 | 3.975 | 176 | 180 | 155 | 180 | 92.2619  | 107.1429 |
| 160 | 4     | 180 | 155 | 155 | 178 | 92.2619  | 105.9524 |
| 161 | 4.025 | 180 | 148 | 155 | 175 | 92.2619  | 104.1667 |
| 162 | 4.05  | 180 | 144 | 155 | 172 | 92.2619  | 102.381  |
| 163 | 4.075 | 180 | 140 | 155 | 168 | 92.2619  | 100      |
| 164 | 4.1   | 180 | 135 | 155 | 165 | 92.2619  | 98.21429 |
| 165 | 4.125 | 180 | 130 | 155 | 163 | 92.2619  | 97.02381 |
| 166 | 4.15  | 180 | 126 | 155 | 161 | 92.2619  | 95.83333 |
| 167 | 4.175 | 180 | 125 | 155 | 158 | 92.2619  | 94.04762 |
| 168 | 4.2   | 180 | 128 | 155 | 157 | 92.2619  | 93.45238 |
| 169 | 4.225 | 180 | 132 | 155 | 156 | 92.2619  | 92.85714 |
| 170 | 4.25  | 180 | 132 | 155 | 155 | 92.2619  | 92.2619  |
| 171 | 4.275 | 180 | 132 | 156 | 155 | 92.85714 | 92.2619  |
| 172 | 4.3   | 180 | 137 | 157 | 155 | 93.45238 | 92.2619  |
| 173 | 4.325 | 180 | 137 | 158 | 155 | 94.04762 | 92.2619  |
| 174 | 4.35  | 180 | 149 | 161 | 155 | 95.83333 | 92.2619  |
| 175 | 4.375 | 180 | 149 | 163 | 155 | 97.02381 | 92.2619  |
| 176 | 4.4   | 180 | 155 | 165 | 155 | 98.21429 | 92.2619  |
| 177 | 4.425 | 180 | 164 | 168 | 155 | 100      | 92.2619  |
| 178 | 4.45  | 180 | 171 | 172 | 155 | 102.381  | 92.2619  |
| 179 | 4.475 | 180 | 180 | 175 | 155 | 104.1667 | 92.2619  |
| 180 | 4.5   | 180 | 180 | 178 | 155 | 105.9524 | 92.2619  |
| 181 | 4.525 | 180 | 180 | 180 | 155 | 107.1429 | 92.2619  |

|     |       |     |     |     |     |          |          |
|-----|-------|-----|-----|-----|-----|----------|----------|
| 182 | 4.55  | 180 | 180 | 180 | 155 | 107.1429 | 92.2619  |
| 183 | 4.575 | 180 | 180 | 180 | 155 | 107.1429 | 92.2619  |
| 184 | 4.6   | 180 | 180 | 180 | 155 | 107.1429 | 92.2619  |
| 185 | 4.625 | 180 | 180 | 180 | 155 | 107.1429 | 92.2619  |
| 186 | 4.65  | 180 | 180 | 180 | 155 | 107.1429 | 92.2619  |
| 187 | 4.675 | 180 | 180 | 180 | 155 | 107.1429 | 92.2619  |
| 188 | 4.7   | 180 | 180 | 180 | 155 | 107.1429 | 92.2619  |
| 189 | 4.725 | 180 | 180 | 180 | 155 | 107.1429 | 92.2619  |
| 190 | 4.75  | 180 | 180 | 180 | 155 | 107.1429 | 92.2619  |
| 191 | 4.775 | 180 | 180 | 180 | 155 | 107.1429 | 92.2619  |
| 192 | 4.8   | 180 | 180 | 178 | 156 | 105.9524 | 92.85714 |
| 193 | 4.825 | 180 | 180 | 175 | 157 | 104.1667 | 93.45238 |
| 194 | 4.85  | 180 | 180 | 172 | 158 | 102.381  | 94.04762 |
| 195 | 4.875 | 180 | 180 | 168 | 161 | 100      | 95.83333 |
| 196 | 4.9   | 180 | 180 | 165 | 163 | 98.21429 | 97.02381 |
| 197 | 4.925 | 155 | 180 | 163 | 165 | 97.02381 | 98.21429 |
| 198 | 4.95  | 148 | 180 | 161 | 168 | 95.83333 | 100      |
| 199 | 4.975 | 144 | 180 | 158 | 172 | 94.04762 | 102.381  |
| 200 | 5     | 140 | 180 | 157 | 175 | 93.45238 | 104.1667 |
| 201 | 5.025 | 135 | 180 | 156 | 178 | 92.85714 | 105.9524 |
| 202 | 5.05  | 130 | 180 | 155 | 180 | 92.2619  | 107.1429 |
| 203 | 5.075 | 126 | 180 | 155 | 180 | 92.2619  | 107.1429 |
| 204 | 5.1   | 125 | 180 | 155 | 180 | 92.2619  | 107.1429 |
| 205 | 5.125 | 128 | 180 | 155 | 180 | 92.2619  | 107.1429 |
| 206 | 5.15  | 132 | 180 | 155 | 180 | 92.2619  | 107.1429 |
| 207 | 5.175 | 132 | 180 | 155 | 180 | 92.2619  | 107.1429 |
| 208 | 5.2   | 132 | 180 | 155 | 180 | 92.2619  | 107.1429 |
| 209 | 5.225 | 137 | 180 | 155 | 180 | 92.2619  | 107.1429 |
| 210 | 5.25  | 137 | 180 | 155 | 180 | 92.2619  | 107.1429 |
| 211 | 5.275 | 149 | 180 | 155 | 180 | 92.2619  | 107.1429 |
| 212 | 5.3   | 149 | 180 | 155 | 180 | 92.2619  | 107.1429 |
| 213 | 5.325 | 155 | 180 | 155 | 178 | 92.2619  | 105.9524 |
| 214 | 5.35  | 164 | 180 | 155 | 175 | 92.2619  | 104.1667 |
| 215 | 5.375 | 171 | 180 | 155 | 172 | 92.2619  | 102.381  |
| 216 | 5.4   | 180 | 156 | 155 | 168 | 92.2619  | 100      |
| 217 | 5.425 | 180 | 151 | 155 | 165 | 92.2619  | 98.21429 |
| 218 | 5.45  | 180 | 145 | 155 | 163 | 92.2619  | 97.02381 |
| 219 | 5.475 | 180 | 145 | 155 | 161 | 92.2619  | 95.83333 |
| 220 | 5.5   | 180 | 145 | 155 | 158 | 92.2619  | 94.04762 |
| 221 | 5.525 | 180 | 145 | 155 | 157 | 92.2619  | 93.45238 |
| 222 | 5.55  | 180 | 135 | 155 | 156 | 92.2619  | 92.85714 |
| 223 | 5.575 | 180 | 129 | 155 | 155 | 92.2619  | 92.2619  |
| 224 | 5.6   | 180 | 128 | 156 | 155 | 92.85714 | 92.2619  |
| 225 | 5.625 | 180 | 130 | 157 | 155 | 93.45238 | 92.2619  |
| 226 | 5.65  | 180 | 130 | 158 | 155 | 94.04762 | 92.2619  |
| 227 | 5.675 | 180 | 135 | 161 | 155 | 95.83333 | 92.2619  |

|     |       |     |     |     |     |          |          |
|-----|-------|-----|-----|-----|-----|----------|----------|
| 228 | 5.7   | 180 | 135 | 163 | 155 | 97.02381 | 92.2619  |
| 229 | 5.725 | 180 | 135 | 165 | 155 | 98.21429 | 92.2619  |
| 230 | 5.75  | 180 | 142 | 168 | 155 | 100      | 92.2619  |
| 231 | 5.775 | 180 | 144 | 172 | 155 | 102.381  | 92.2619  |
| 232 | 5.8   | 180 | 144 | 175 | 155 | 104.1667 | 92.2619  |
| 233 | 5.825 | 180 | 144 | 178 | 155 | 105.9524 | 92.2619  |
| 234 | 5.85  | 180 | 152 | 180 | 155 | 107.1429 | 92.2619  |
| 235 | 5.875 | 180 | 158 | 180 | 155 | 107.1429 | 92.2619  |
| 236 | 5.9   | 180 | 165 | 180 | 155 | 107.1429 | 92.2619  |
| 237 | 5.925 | 180 | 180 | 180 | 155 | 107.1429 | 92.2619  |
| 238 | 5.95  | 180 | 180 | 180 | 155 | 107.1429 | 92.2619  |
| 239 | 5.975 | 180 | 180 | 180 | 155 | 107.1429 | 92.2619  |
| 240 | 6     | 180 | 180 | 180 | 155 | 107.1429 | 92.2619  |
| 241 | 6.025 | 180 | 180 | 180 | 155 | 107.1429 | 92.2619  |
| 242 | 6.05  | 180 | 180 | 180 | 155 | 107.1429 | 92.2619  |
| 243 | 6.075 | 180 | 180 | 180 | 155 | 107.1429 | 92.2619  |
| 244 | 6.1   | 180 | 180 | 180 | 155 | 107.1429 | 92.2619  |
| 245 | 6.125 | 180 | 180 | 178 | 156 | 105.9524 | 92.85714 |
| 246 | 6.15  | 180 | 180 | 175 | 157 | 104.1667 | 93.45238 |
| 247 | 6.175 | 180 | 180 | 172 | 158 | 102.381  | 94.04762 |
| 248 | 6.2   | 180 | 180 | 168 | 161 | 100      | 95.83333 |
| 249 | 6.225 | 180 | 180 | 165 | 163 | 98.21429 | 97.02381 |
| 250 | 6.25  | 180 | 180 | 163 | 165 | 97.02381 | 98.21429 |
| 251 | 6.275 | 180 | 180 | 161 | 168 | 95.83333 | 100      |
| 252 | 6.3   | 156 | 180 | 158 | 172 | 94.04762 | 102.381  |
| 253 | 6.325 | 151 | 180 | 157 | 175 | 93.45238 | 104.1667 |
| 254 | 6.35  | 145 | 180 | 156 | 178 | 92.85714 | 105.9524 |
| 255 | 6.375 | 145 | 180 | 155 | 180 | 92.2619  | 107.1429 |
| 256 | 6.4   | 145 | 180 | 155 | 180 | 92.2619  | 107.1429 |
| 257 | 6.425 | 145 | 180 | 155 | 180 | 92.2619  | 107.1429 |
| 258 | 6.45  | 135 | 180 | 155 | 180 | 92.2619  | 107.1429 |
| 259 | 6.475 | 129 | 180 | 155 | 180 | 92.2619  | 107.1429 |
| 260 | 6.5   | 128 | 180 | 155 | 180 | 92.2619  | 107.1429 |
| 261 | 6.525 | 130 | 180 | 155 | 180 | 92.2619  | 107.1429 |
| 262 | 6.55  | 130 | 180 | 155 | 180 | 92.2619  | 107.1429 |
| 263 | 6.575 | 135 | 180 | 155 | 180 | 92.2619  | 107.1429 |
| 264 | 6.6   | 135 | 180 | 155 | 180 | 92.2619  | 107.1429 |
| 265 | 6.625 | 135 | 180 | 155 | 180 | 92.2619  | 107.1429 |
| 266 | 6.65  | 142 | 180 | 155 | 178 | 92.2619  | 105.9524 |
| 267 | 6.675 | 144 | 180 | 155 | 175 | 92.2619  | 104.1667 |
| 268 | 6.7   | 144 | 180 | 155 | 172 | 92.2619  | 102.381  |
| 269 | 6.725 | 144 | 180 | 155 | 168 | 92.2619  | 100      |
| 270 | 6.75  | 152 | 180 | 155 | 165 | 92.2619  | 98.21429 |
| 271 | 6.775 | 158 | 180 | 155 | 163 | 92.2619  | 97.02381 |
| 272 | 6.8   | 165 | 180 | 155 | 161 | 92.2619  | 95.83333 |
| 273 | 6.825 | 180 | 158 | 155 | 158 | 92.2619  | 94.04762 |

|     |       |     |     |     |     |          |          |
|-----|-------|-----|-----|-----|-----|----------|----------|
| 274 | 6.85  | 180 | 153 | 155 | 157 | 92.2619  | 93.45238 |
| 275 | 6.875 | 180 | 142 | 155 | 156 | 92.2619  | 92.85714 |
| 276 | 6.9   | 180 | 135 | 155 | 155 | 92.2619  | 92.2619  |
| 277 | 6.925 | 180 | 131 | 156 | 155 | 92.85714 | 92.2619  |
| 278 | 6.95  | 180 | 131 | 157 | 155 | 93.45238 | 92.2619  |
| 279 | 6.975 | 180 | 131 | 158 | 155 | 94.04762 | 92.2619  |
| 280 | 7     | 180 | 131 | 161 | 155 | 95.83333 | 92.2619  |
| 281 | 7.025 | 180 | 126 | 163 | 155 | 97.02381 | 92.2619  |
| 282 | 7.05  | 180 | 128 | 165 | 155 | 98.21429 | 92.2619  |
| 283 | 7.075 | 180 | 126 | 168 | 155 | 100      | 92.2619  |
| 284 | 7.1   | 180 | 125 | 172 | 155 | 102.381  | 92.2619  |
| 285 | 7.125 | 180 | 131 | 175 | 155 | 104.1667 | 92.2619  |
| 286 | 7.15  | 180 | 135 | 178 | 155 | 105.9524 | 92.2619  |
| 287 | 7.175 | 180 | 145 | 180 | 155 | 107.1429 | 92.2619  |
| 288 | 7.2   | 180 | 150 | 180 | 155 | 107.1429 | 92.2619  |
| 289 | 7.225 | 180 | 150 | 180 | 155 | 107.1429 | 92.2619  |
| 290 | 7.25  | 180 | 158 | 180 | 155 | 107.1429 | 92.2619  |
| 291 | 7.275 | 180 | 158 | 180 | 155 | 107.1429 | 92.2619  |
| 292 | 7.3   | 180 | 158 | 180 | 155 | 107.1429 | 92.2619  |
| 293 | 7.325 | 180 | 168 | 180 | 155 | 107.1429 | 92.2619  |
| 294 | 7.35  | 180 | 180 | 180 | 155 | 107.1429 | 92.2619  |
| 295 | 7.375 | 180 | 180 | 180 | 155 | 107.1429 | 92.2619  |
| 296 | 7.4   | 180 | 180 | 180 | 155 | 107.1429 | 92.2619  |
| 297 | 7.425 | 180 | 180 | 180 | 155 | 107.1429 | 92.2619  |
| 298 | 7.45  | 180 | 180 | 178 | 156 | 105.9524 | 92.85714 |
| 299 | 7.475 | 180 | 180 | 175 | 157 | 104.1667 | 93.45238 |
| 300 | 7.5   | 180 | 180 | 172 | 158 | 102.381  | 94.04762 |
| 301 | 7.525 | 180 | 180 | 168 | 161 | 100      | 95.83333 |
| 302 | 7.55  | 180 | 180 | 165 | 163 | 98.21429 | 97.02381 |
| 303 | 7.575 | 180 | 180 | 163 | 165 | 97.02381 | 98.21429 |
| 304 | 7.6   | 180 | 180 | 161 | 168 | 95.83333 | 100      |
| 305 | 7.625 | 180 | 180 | 158 | 172 | 94.04762 | 102.381  |
| 306 | 7.65  | 180 | 180 | 157 | 175 | 93.45238 | 104.1667 |
| 307 | 7.675 | 180 | 180 | 156 | 178 | 92.85714 | 105.9524 |
| 308 | 7.7   | 180 | 180 | 155 | 180 | 92.2619  | 107.1429 |
| 309 | 7.725 | 180 | 180 | 155 | 180 | 92.2619  | 107.1429 |
| 310 | 7.75  | 158 | 180 | 155 | 180 | 92.2619  | 107.1429 |
| 311 | 7.775 | 153 | 180 | 155 | 180 | 92.2619  | 107.1429 |
| 312 | 7.8   | 142 | 180 | 155 | 180 | 92.2619  | 107.1429 |
| 313 | 7.825 | 135 | 180 | 155 | 180 | 92.2619  | 107.1429 |
| 314 | 7.85  | 131 | 180 | 155 | 180 | 92.2619  | 107.1429 |
| 315 | 7.875 | 131 | 180 | 155 | 180 | 92.2619  | 107.1429 |
| 316 | 7.9   | 131 | 180 | 155 | 180 | 92.2619  | 107.1429 |
| 317 | 7.925 | 131 | 180 | 155 | 180 | 92.2619  | 107.1429 |
| 318 | 7.95  | 126 | 180 | 155 | 180 | 92.2619  | 107.1429 |
| 319 | 7.975 | 128 | 180 | 155 | 178 | 92.2619  | 105.9524 |

|     |       |     |     |     |     |          |          |
|-----|-------|-----|-----|-----|-----|----------|----------|
| 320 | 8     | 126 | 180 | 155 | 175 | 92.2619  | 104.1667 |
| 321 | 8.025 | 125 | 180 | 155 | 172 | 92.2619  | 102.381  |
| 322 | 8.05  | 131 | 180 | 155 | 168 | 92.2619  | 100      |
| 323 | 8.075 | 135 | 180 | 155 | 165 | 92.2619  | 98.21429 |
| 324 | 8.1   | 145 | 180 | 155 | 163 | 92.2619  | 97.02381 |
| 325 | 8.125 | 150 | 180 | 155 | 161 | 92.2619  | 95.83333 |
| 326 | 8.15  | 150 | 180 | 155 | 158 | 92.2619  | 94.04762 |
| 327 | 8.175 | 158 | 180 | 155 | 157 | 92.2619  | 93.45238 |
| 328 | 8.2   | 158 | 180 | 155 | 156 | 92.2619  | 92.85714 |
| 329 | 8.225 | 158 | 180 | 155 | 155 | 92.2619  | 92.2619  |
| 330 | 8.25  | 168 | 180 | 156 | 155 | 92.85714 | 92.2619  |
| 331 | 8.275 | 180 | 160 | 157 | 155 | 93.45238 | 92.2619  |
| 332 | 8.3   | 180 | 152 | 158 | 155 | 94.04762 | 92.2619  |
| 333 | 8.325 | 180 | 143 | 161 | 155 | 95.83333 | 92.2619  |
| 334 | 8.35  | 180 | 135 | 163 | 155 | 97.02381 | 92.2619  |
| 335 | 8.375 | 180 | 130 | 165 | 155 | 98.21429 | 92.2619  |
| 336 | 8.4   | 180 | 124 | 168 | 155 | 100      | 92.2619  |
| 337 | 8.425 | 180 | 125 | 172 | 155 | 102.381  | 92.2619  |
| 338 | 8.45  | 180 | 125 | 175 | 155 | 104.1667 | 92.2619  |
| 339 | 8.475 | 180 | 122 | 178 | 155 | 105.9524 | 92.2619  |
| 340 | 8.5   | 180 | 122 | 180 | 155 | 107.1429 | 92.2619  |
| 341 | 8.525 | 180 | 122 | 180 | 155 | 107.1429 | 92.2619  |
| 342 | 8.55  | 180 | 126 | 180 | 155 | 107.1429 | 92.2619  |
| 343 | 8.575 | 180 | 126 | 180 | 155 | 107.1429 | 92.2619  |
| 344 | 8.6   | 180 | 132 | 180 | 155 | 107.1429 | 92.2619  |
| 345 | 8.625 | 180 | 139 | 180 | 155 | 107.1429 | 92.2619  |
| 346 | 8.65  | 180 | 146 | 180 | 155 | 107.1429 | 92.2619  |
| 347 | 8.675 | 180 | 154 | 180 | 155 | 107.1429 | 92.2619  |
| 348 | 8.7   | 180 | 161 | 180 | 155 | 107.1429 | 92.2619  |
| 349 | 8.725 | 180 | 171 | 180 | 155 | 107.1429 | 92.2619  |
| 350 | 8.75  | 180 | 180 | 180 | 155 | 107.1429 | 92.2619  |
| 351 | 8.775 | 180 | 180 | 178 | 156 | 105.9524 | 92.85714 |
| 352 | 8.8   | 180 | 180 | 175 | 157 | 104.1667 | 93.45238 |
| 353 | 8.825 | 180 | 180 | 172 | 158 | 102.381  | 94.04762 |
| 354 | 8.85  | 180 | 180 | 168 | 161 | 100      | 95.83333 |
| 355 | 8.875 | 180 | 180 | 165 | 163 | 98.21429 | 97.02381 |
| 356 | 8.9   | 180 | 180 | 163 | 165 | 97.02381 | 98.21429 |
| 357 | 8.925 | 180 | 180 | 161 | 168 | 95.83333 | 100      |
| 358 | 8.95  | 180 | 180 | 158 | 172 | 94.04762 | 102.381  |
| 359 | 8.975 | 180 | 180 | 157 | 175 | 93.45238 | 104.1667 |
| 360 | 9     | 180 | 180 | 156 | 178 | 92.85714 | 105.9524 |
| 361 | 9.025 | 180 | 180 | 155 | 180 | 92.2619  | 107.1429 |
| 362 | 9.05  | 180 | 180 | 155 | 180 | 92.2619  | 107.1429 |
| 363 | 9.075 | 180 | 180 | 155 | 180 | 92.2619  | 107.1429 |
| 364 | 9.1   | 180 | 180 | 155 | 180 | 92.2619  | 107.1429 |
| 365 | 9.125 | 180 | 180 | 155 | 180 | 92.2619  | 107.1429 |



|     |        |     |     |     |     |          |          |
|-----|--------|-----|-----|-----|-----|----------|----------|
| 366 | 9.15   | 180 | 180 | 155 | 180 | 92.2619  | 107.1429 |
| 367 | 9.175  | 160 | 180 | 155 | 180 | 92.2619  | 107.1429 |
| 368 | 9.2    | 152 | 180 | 155 | 180 | 92.2619  | 107.1429 |
| 369 | 9.225  | 143 | 180 | 155 | 180 | 92.2619  | 107.1429 |
| 370 | 9.25   | 135 | 180 | 155 | 180 | 92.2619  | 107.1429 |
| 371 | 9.275  | 130 | 180 | 155 | 180 | 92.2619  | 107.1429 |
| 372 | 9.3    | 124 | 180 | 155 | 178 | 92.2619  | 105.9524 |
| 373 | 9.325  | 125 | 180 | 155 | 175 | 92.2619  | 104.1667 |
| 374 | 9.35   | 125 | 180 | 155 | 172 | 92.2619  | 102.381  |
| 375 | 9.375  | 122 | 180 | 155 | 168 | 92.2619  | 100      |
| 376 | 9.4    | 122 | 180 | 155 | 165 | 92.2619  | 98.21429 |
| 377 | 9.425  | 122 | 180 | 155 | 163 | 92.2619  | 97.02381 |
| 378 | 9.45   | 126 | 180 | 155 | 161 | 92.2619  | 95.83333 |
| 379 | 9.475  | 126 | 180 | 155 | 158 | 92.2619  | 94.04762 |
| 380 | 9.5    | 132 | 180 | 155 | 157 | 92.2619  | 93.45238 |
| 381 | 9.525  | 139 | 180 | 155 | 156 | 92.2619  | 92.85714 |
| 382 | 9.55   | 146 | 180 | 155 | 155 | 92.2619  | 92.2619  |
| 383 | 9.575  | 154 | 180 | 156 | 155 | 92.85714 | 92.2619  |
| 384 | 9.6    | 161 | 180 | 157 | 155 | 93.45238 | 92.2619  |
| 385 | 9.625  | 171 | 180 | 158 | 155 | 94.04762 | 92.2619  |
| 386 | 9.65   | 180 | 163 | 161 | 155 | 95.83333 | 92.2619  |
| 387 | 9.675  | 180 | 163 | 163 | 155 | 97.02381 | 92.2619  |
| 388 | 9.7    | 180 | 163 | 165 | 155 | 98.21429 | 92.2619  |
| 389 | 9.725  | 180 | 160 | 168 | 155 | 100      | 92.2619  |
| 390 | 9.75   | 180 | 153 | 172 | 155 | 102.381  | 92.2619  |
| 391 | 9.775  | 180 | 147 | 175 | 155 | 104.1667 | 92.2619  |
| 392 | 9.8    | 180 | 135 | 178 | 155 | 105.9524 | 92.2619  |
| 393 | 9.825  | 180 | 130 | 180 | 155 | 107.1429 | 92.2619  |
| 394 | 9.85   | 180 | 125 | 180 | 155 | 107.1429 | 92.2619  |
| 395 | 9.875  | 180 | 125 | 180 | 155 | 107.1429 | 92.2619  |
| 396 | 9.9    | 180 | 125 | 180 | 155 | 107.1429 | 92.2619  |
| 397 | 9.925  | 180 | 124 | 180 | 155 | 107.1429 | 92.2619  |
| 398 | 9.95   | 180 | 125 | 180 | 155 | 107.1429 | 92.2619  |
| 399 | 9.975  | 180 | 125 | 180 | 155 | 107.1429 | 92.2619  |
| 400 | 10     | 180 | 125 | 180 | 155 | 107.1429 | 92.2619  |
| 401 | 10.025 | 180 | 125 | 180 | 155 | 107.1429 | 92.2619  |
| 402 | 10.05  | 180 | 135 | 180 | 155 | 107.1429 | 92.2619  |
| 403 | 10.075 | 180 | 136 | 180 | 155 | 107.1429 | 92.2619  |
| 404 | 10.1   | 180 | 136 | 178 | 156 | 105.9524 | 92.85714 |
| 405 | 10.125 | 180 | 137 | 175 | 157 | 104.1667 | 93.45238 |
| 406 | 10.15  | 180 | 155 | 172 | 158 | 102.381  | 94.04762 |
| 407 | 10.175 | 180 | 162 | 168 | 161 | 100      | 95.83333 |
| 408 | 10.2   | 180 | 170 | 165 | 163 | 98.21429 | 97.02381 |
| 409 | 10.225 | 180 | 180 | 163 | 165 | 97.02381 | 98.21429 |
| 410 | 10.25  | 180 | 180 | 161 | 168 | 95.83333 | 100      |
| 411 | 10.275 | 180 | 180 | 158 | 172 | 94.04762 | 102.381  |

|     |        |     |     |     |     |          |          |
|-----|--------|-----|-----|-----|-----|----------|----------|
| 412 | 10.3   | 180 | 180 | 157 | 175 | 93.45238 | 104.1667 |
| 413 | 10.325 | 180 | 180 | 156 | 178 | 92.85714 | 105.9524 |
| 414 | 10.35  | 180 | 180 | 155 | 180 | 92.2619  | 107.1429 |
| 415 | 10.375 | 180 | 180 | 155 | 180 | 92.2619  | 107.1429 |
| 416 | 10.4   | 180 | 180 | 155 | 180 | 92.2619  | 107.1429 |
| 417 | 10.425 | 180 | 180 | 155 | 180 | 92.2619  | 107.1429 |
| 418 | 10.45  | 180 | 180 | 155 | 180 | 92.2619  | 107.1429 |
| 419 | 10.475 | 180 | 180 | 155 | 180 | 92.2619  | 107.1429 |
| 420 | 10.5   | 180 | 180 | 155 | 180 | 92.2619  | 107.1429 |
| 421 | 10.525 | 180 | 180 | 155 | 180 | 92.2619  | 107.1429 |
| 422 | 10.55  | 180 | 180 | 155 | 180 | 92.2619  | 107.1429 |
| 423 | 10.575 | 163 | 180 | 155 | 180 | 92.2619  | 107.1429 |
| 424 | 10.6   | 163 | 180 | 155 | 180 | 92.2619  | 107.1429 |
| 425 | 10.625 | 163 | 180 | 155 | 178 | 92.2619  | 105.9524 |
| 426 | 10.65  | 160 | 180 | 155 | 175 | 92.2619  | 104.1667 |
| 427 | 10.675 | 153 | 180 | 155 | 172 | 92.2619  | 102.381  |
| 428 | 10.7   | 147 | 180 | 155 | 168 | 92.2619  | 100      |
| 429 | 10.725 | 135 | 180 | 155 | 165 | 92.2619  | 98.21429 |
| 430 | 10.75  | 130 | 180 | 155 | 163 | 92.2619  | 97.02381 |
| 431 | 10.775 | 125 | 180 | 155 | 161 | 92.2619  | 95.83333 |
| 432 | 10.8   | 125 | 180 | 155 | 158 | 92.2619  | 94.04762 |
| 433 | 10.825 | 125 | 180 | 155 | 157 | 92.2619  | 93.45238 |
| 434 | 10.85  | 124 | 180 | 155 | 156 | 92.2619  | 92.85714 |
| 435 | 10.875 | 125 | 180 | 155 | 155 | 92.2619  | 92.2619  |
| 436 | 10.9   | 125 | 180 | 156 | 155 | 92.85714 | 92.2619  |
| 437 | 10.925 | 125 | 180 | 157 | 155 | 93.45238 | 92.2619  |
| 438 | 10.95  | 125 | 180 | 158 | 155 | 94.04762 | 92.2619  |
| 439 | 10.975 | 135 | 180 | 161 | 155 | 95.83333 | 92.2619  |
| 440 | 11     | 136 | 180 | 163 | 155 | 97.02381 | 92.2619  |
| 441 | 11.025 | 136 | 180 | 165 | 155 | 98.21429 | 92.2619  |
| 442 | 11.05  | 137 | 180 | 168 | 155 | 100      | 92.2619  |
| 443 | 11.075 | 155 | 180 | 172 | 155 | 102.381  | 92.2619  |
| 444 | 11.1   | 162 | 180 | 175 | 155 | 104.1667 | 92.2619  |
| 445 | 11.125 | 170 | 180 | 178 | 155 | 105.9524 | 92.2619  |
| 446 | 11.15  | 180 | 162 | 180 | 155 | 107.1429 | 92.2619  |
| 447 | 11.175 | 180 | 158 | 180 | 155 | 107.1429 | 92.2619  |
| 448 | 11.2   | 180 | 151 | 180 | 155 | 107.1429 | 92.2619  |
| 449 | 11.225 | 180 | 144 | 180 | 155 | 107.1429 | 92.2619  |
| 450 | 11.25  | 180 | 139 | 180 | 155 | 107.1429 | 92.2619  |
| 451 | 11.275 | 180 | 139 | 180 | 155 | 107.1429 | 92.2619  |
| 452 | 11.3   | 180 | 139 | 180 | 155 | 107.1429 | 92.2619  |
| 453 | 11.325 | 180 | 139 | 180 | 155 | 107.1429 | 92.2619  |
| 454 | 11.35  | 180 | 139 | 180 | 155 | 107.1429 | 92.2619  |
| 455 | 11.375 | 180 | 130 | 180 | 155 | 107.1429 | 92.2619  |
| 456 | 11.4   | 180 | 125 | 180 | 155 | 107.1429 | 92.2619  |
| 457 | 11.425 | 180 | 125 | 178 | 156 | 105.9524 | 92.85714 |

|     |        |     |     |     |     |          |          |
|-----|--------|-----|-----|-----|-----|----------|----------|
| 458 | 11.45  | 180 | 120 | 175 | 157 | 104.1667 | 93.45238 |
| 459 | 11.475 | 180 | 120 | 172 | 158 | 102.381  | 94.04762 |
| 460 | 11.5   | 180 | 125 | 168 | 161 | 100      | 95.83333 |
| 461 | 11.525 | 180 | 128 | 165 | 163 | 98.21429 | 97.02381 |
| 462 | 11.55  | 180 | 132 | 163 | 165 | 97.02381 | 98.21429 |
| 463 | 11.575 | 180 | 138 | 161 | 168 | 95.83333 | 100      |
| 464 | 11.6   | 180 | 138 | 158 | 172 | 94.04762 | 102.381  |
| 465 | 11.625 | 180 | 138 | 157 | 175 | 93.45238 | 104.1667 |
| 466 | 11.65  | 180 | 138 | 156 | 178 | 92.85714 | 105.9524 |
| 467 | 11.675 | 180 | 145 | 155 | 180 | 92.2619  | 107.1429 |
| 468 | 11.7   | 180 | 155 | 155 | 180 | 92.2619  | 107.1429 |
| 469 | 11.725 | 180 | 165 | 155 | 180 | 92.2619  | 107.1429 |
| 470 | 11.75  | 180 | 172 | 155 | 180 | 92.2619  | 107.1429 |
| 471 | 11.775 | 180 | 180 | 155 | 180 | 92.2619  | 107.1429 |
| 472 | 11.8   | 180 | 180 | 155 | 180 | 92.2619  | 107.1429 |
| 473 | 11.825 | 180 | 180 | 155 | 180 | 92.2619  | 107.1429 |
| 474 | 11.85  | 180 | 180 | 155 | 180 | 92.2619  | 107.1429 |
| 475 | 11.875 | 180 | 180 | 155 | 180 | 92.2619  | 107.1429 |
| 476 | 11.9   | 180 | 180 | 155 | 180 | 92.2619  | 107.1429 |
| 477 | 11.925 | 180 | 180 | 155 | 180 | 92.2619  | 107.1429 |
| 478 | 11.95  | 180 | 180 | 155 | 178 | 92.2619  | 105.9524 |
| 479 | 11.975 | 162 | 180 | 155 | 175 | 92.2619  | 104.1667 |
| 480 | 12     | 158 | 180 | 155 | 172 | 92.2619  | 102.381  |
| 481 | 12.025 | 151 | 180 | 155 | 168 | 92.2619  | 100      |
| 482 | 12.05  | 144 | 180 | 155 | 165 | 92.2619  | 98.21429 |
| 483 | 12.075 | 139 | 180 | 155 | 163 | 92.2619  | 97.02381 |
| 484 | 12.1   | 139 | 180 | 155 | 161 | 92.2619  | 95.83333 |
| 485 | 12.125 | 139 | 180 | 155 | 158 | 92.2619  | 94.04762 |
| 486 | 12.15  | 139 | 180 | 155 | 157 | 92.2619  | 93.45238 |
| 487 | 12.175 | 139 | 180 | 155 | 156 | 92.2619  | 92.85714 |
| 488 | 12.2   | 130 | 180 | 155 | 155 | 92.2619  | 92.2619  |
| 489 | 12.225 | 125 | 180 | 156 | 155 | 92.85714 | 92.2619  |
| 490 | 12.25  | 125 | 180 | 157 | 155 | 93.45238 | 92.2619  |
| 491 | 12.275 | 120 | 180 | 158 | 155 | 94.04762 | 92.2619  |
| 492 | 12.3   | 120 | 180 | 161 | 155 | 95.83333 | 92.2619  |
| 493 | 12.325 | 125 | 180 | 163 | 155 | 97.02381 | 92.2619  |
| 494 | 12.35  | 128 | 180 | 165 | 155 | 98.21429 | 92.2619  |
| 495 | 12.375 | 132 | 180 | 168 | 155 | 100      | 92.2619  |
| 496 | 12.4   | 138 | 180 | 172 | 155 | 102.381  | 92.2619  |
| 497 | 12.425 | 138 | 180 | 175 | 155 | 104.1667 | 92.2619  |
| 498 | 12.45  | 138 | 180 | 178 | 155 | 105.9524 | 92.2619  |
| 499 | 12.475 | 138 | 180 | 180 | 155 | 107.1429 | 92.2619  |
| 500 | 12.5   | 145 | 180 | 180 | 155 | 107.1429 | 92.2619  |
| 501 | 12.525 | 155 | 180 | 180 | 155 | 107.1429 | 92.2619  |
| 502 | 12.55  | 165 | 180 | 180 | 155 | 107.1429 | 92.2619  |
| 503 | 12.575 | 172 | 180 | 180 | 155 | 107.1429 | 92.2619  |

|     |        |     |     |     |     |          |          |
|-----|--------|-----|-----|-----|-----|----------|----------|
| 504 | 12.6   | 180 | 162 | 180 | 155 | 107.1429 | 92.2619  |
| 505 | 12.625 | 180 | 158 | 180 | 155 | 107.1429 | 92.2619  |
| 506 | 12.65  | 180 | 153 | 180 | 155 | 107.1429 | 92.2619  |
| 507 | 12.675 | 180 | 144 | 180 | 155 | 107.1429 | 92.2619  |
| 508 | 12.7   | 180 | 135 | 180 | 155 | 107.1429 | 92.2619  |
| 509 | 12.725 | 180 | 132 | 180 | 155 | 107.1429 | 92.2619  |
| 510 | 12.75  | 180 | 128 | 178 | 156 | 105.9524 | 92.85714 |
| 511 | 12.775 | 180 | 126 | 175 | 157 | 104.1667 | 93.45238 |
| 512 | 12.8   | 180 | 124 | 172 | 158 | 102.381  | 94.04762 |
| 513 | 12.825 | 180 | 124 | 168 | 161 | 100      | 95.83333 |
| 514 | 12.85  | 180 | 124 | 165 | 163 | 98.21429 | 97.02381 |
| 515 | 12.875 | 180 | 124 | 163 | 165 | 97.02381 | 98.21429 |
| 516 | 12.9   | 180 | 125 | 161 | 168 | 95.83333 | 100      |
| 517 | 12.925 | 180 | 130 | 158 | 172 | 94.04762 | 102.381  |
| 518 | 12.95  | 180 | 132 | 157 | 175 | 93.45238 | 104.1667 |
| 519 | 12.975 | 180 | 135 | 156 | 178 | 92.85714 | 105.9524 |
| 520 | 13     | 180 | 139 | 155 | 180 | 92.2619  | 107.1429 |
| 521 | 13.025 | 180 | 149 | 155 | 180 | 92.2619  | 107.1429 |
| 522 | 13.05  | 180 | 156 | 155 | 180 | 92.2619  | 107.1429 |
| 523 | 13.075 | 180 | 165 | 155 | 180 | 92.2619  | 107.1429 |
| 524 | 13.1   | 180 | 170 | 155 | 180 | 92.2619  | 107.1429 |
| 525 | 13.125 | 180 | 180 | 155 | 180 | 92.2619  | 107.1429 |
| 526 | 13.15  | 180 | 180 | 155 | 180 | 92.2619  | 107.1429 |
| 527 | 13.175 | 180 | 180 | 155 | 180 | 92.2619  | 107.1429 |
| 528 | 13.2   | 180 | 180 | 155 | 180 | 92.2619  | 107.1429 |
| 529 | 13.225 | 180 | 180 | 155 | 180 | 92.2619  | 107.1429 |
| 530 | 13.25  | 180 | 180 | 155 | 180 | 92.2619  | 107.1429 |
| 531 | 13.275 | 180 | 180 | 155 | 178 | 92.2619  | 105.9524 |
| 532 | 13.3   | 180 | 180 | 155 | 175 | 92.2619  | 104.1667 |
| 533 | 13.325 | 180 | 180 | 155 | 172 | 92.2619  | 102.381  |
| 534 | 13.35  | 180 | 180 | 155 | 168 | 92.2619  | 100      |
| 535 | 13.375 | 180 | 180 | 155 | 165 | 92.2619  | 98.21429 |
| 536 | 13.4   | 162 | 180 | 155 | 163 | 92.2619  | 97.02381 |
| 537 | 13.425 | 158 | 180 | 155 | 161 | 92.2619  | 95.83333 |
| 538 | 13.45  | 153 | 180 | 155 | 158 | 92.2619  | 94.04762 |
| 539 | 13.475 | 144 | 180 | 155 | 157 | 92.2619  | 93.45238 |
| 540 | 13.5   | 135 | 180 | 155 | 156 | 92.2619  | 92.85714 |
| 541 | 13.525 | 132 | 180 | 155 | 155 | 92.2619  | 92.2619  |
| 542 | 13.55  | 128 | 180 | 156 | 155 | 92.85714 | 92.2619  |
| 543 | 13.575 | 126 | 180 | 157 | 155 | 93.45238 | 92.2619  |
| 544 | 13.6   | 124 | 180 | 158 | 155 | 94.04762 | 92.2619  |
| 545 | 13.625 | 124 | 180 | 161 | 155 | 95.83333 | 92.2619  |
| 546 | 13.65  | 124 | 180 | 163 | 155 | 97.02381 | 92.2619  |
| 547 | 13.675 | 124 | 180 | 165 | 155 | 98.21429 | 92.2619  |
| 548 | 13.7   | 125 | 180 | 168 | 155 | 100      | 92.2619  |
| 549 | 13.725 | 130 | 180 | 172 | 155 | 102.381  | 92.2619  |

|     |        |     |     |     |     |          |          |
|-----|--------|-----|-----|-----|-----|----------|----------|
| 550 | 13.75  | 132 | 180 | 175 | 155 | 104.1667 | 92.2619  |
| 551 | 13.775 | 135 | 180 | 178 | 155 | 105.9524 | 92.2619  |
| 552 | 13.8   | 139 | 180 | 180 | 155 | 107.1429 | 92.2619  |
| 553 | 13.825 | 149 | 180 | 180 | 155 | 107.1429 | 92.2619  |
| 554 | 13.85  | 156 | 180 | 180 | 155 | 107.1429 | 92.2619  |
| 555 | 13.875 | 165 | 180 | 180 | 155 | 107.1429 | 92.2619  |
| 556 | 13.9   | 170 | 180 | 180 | 155 | 107.1429 | 92.2619  |
| 557 | 13.925 | 180 | 166 | 180 | 155 | 107.1429 | 92.2619  |
| 558 | 13.95  | 180 | 160 | 180 | 155 | 107.1429 | 92.2619  |
| 559 | 13.975 | 180 | 154 | 180 | 155 | 107.1429 | 92.2619  |
| 560 | 14     | 180 | 154 | 180 | 155 | 107.1429 | 92.2619  |
| 561 | 14.025 | 180 | 154 | 180 | 155 | 107.1429 | 92.2619  |
| 562 | 14.05  | 180 | 154 | 180 | 155 | 107.1429 | 92.2619  |
| 563 | 14.075 | 180 | 147 | 178 | 156 | 105.9524 | 92.85714 |
| 564 | 14.1   | 180 | 135 | 175 | 157 | 104.1667 | 93.45238 |
| 565 | 14.125 | 180 | 133 | 172 | 158 | 102.381  | 94.04762 |
| 566 | 14.15  | 180 | 125 | 168 | 161 | 100      | 95.83333 |
| 567 | 14.175 | 180 | 125 | 165 | 163 | 98.21429 | 97.02381 |
| 568 | 14.2   | 180 | 125 | 163 | 165 | 97.02381 | 98.21429 |
| 569 | 14.225 | 180 | 127 | 161 | 168 | 95.83333 | 100      |
| 570 | 14.25  | 180 | 127 | 158 | 172 | 94.04762 | 102.381  |
| 571 | 14.275 | 180 | 133 | 157 | 175 | 93.45238 | 104.1667 |
| 572 | 14.3   | 180 | 137 | 156 | 178 | 92.85714 | 105.9524 |
| 573 | 14.325 | 180 | 143 | 155 | 180 | 92.2619  | 107.1429 |
| 574 | 14.35  | 180 | 143 | 155 | 180 | 92.2619  | 107.1429 |
| 575 | 14.375 | 180 | 143 | 155 | 180 | 92.2619  | 107.1429 |
| 576 | 14.4   | 180 | 143 | 155 | 180 | 92.2619  | 107.1429 |
| 577 | 14.425 | 180 | 160 | 155 | 180 | 92.2619  | 107.1429 |
| 578 | 14.45  | 180 | 160 | 155 | 180 | 92.2619  | 107.1429 |
| 579 | 14.475 | 180 | 166 | 155 | 180 | 92.2619  | 107.1429 |
| 580 | 14.5   | 180 | 173 | 155 | 180 | 92.2619  | 107.1429 |
| 581 | 14.525 | 180 | 176 | 155 | 180 | 92.2619  | 107.1429 |
| 582 | 14.55  | 180 | 180 | 155 | 180 | 92.2619  | 107.1429 |
| 583 | 14.575 | 180 | 180 | 155 | 180 | 92.2619  | 107.1429 |
| 584 | 14.6   | 180 | 180 | 155 | 178 | 92.2619  | 105.9524 |
| 585 | 14.625 | 180 | 180 | 155 | 175 | 92.2619  | 104.1667 |
| 586 | 14.65  | 180 | 180 | 155 | 172 | 92.2619  | 102.381  |
| 587 | 14.675 | 180 | 180 | 155 | 168 | 92.2619  | 100      |
| 588 | 14.7   | 180 | 180 | 155 | 165 | 92.2619  | 98.21429 |
| 589 | 14.725 | 180 | 180 | 155 | 163 | 92.2619  | 97.02381 |
| 590 | 14.75  | 166 | 180 | 155 | 161 | 92.2619  | 95.83333 |
| 591 | 14.775 | 160 | 180 | 155 | 158 | 92.2619  | 94.04762 |
| 592 | 14.8   | 154 | 180 | 155 | 157 | 92.2619  | 93.45238 |
| 593 | 14.825 | 154 | 180 | 155 | 156 | 92.2619  | 92.85714 |
| 594 | 14.85  | 154 | 180 | 155 | 155 | 92.2619  | 92.2619  |
| 595 | 14.875 | 154 | 180 | 156 | 155 | 92.85714 | 92.2619  |

|     |        |     |     |     |     |          |          |
|-----|--------|-----|-----|-----|-----|----------|----------|
| 596 | 14.9   | 147 | 180 | 157 | 155 | 93.45238 | 92.2619  |
| 597 | 14.925 | 135 | 180 | 158 | 155 | 94.04762 | 92.2619  |
| 598 | 14.95  | 133 | 180 | 161 | 155 | 95.83333 | 92.2619  |
| 599 | 14.975 | 125 | 180 | 163 | 155 | 97.02381 | 92.2619  |
| 600 | 15     | 125 | 180 | 165 | 155 | 98.21429 | 92.2619  |
| 601 | 15.025 | 125 | 180 | 168 | 155 | 100      | 92.2619  |
| 602 | 15.05  | 127 | 180 | 172 | 155 | 102.381  | 92.2619  |
| 603 | 15.075 | 127 | 180 | 175 | 155 | 104.1667 | 92.2619  |
| 604 | 15.1   | 133 | 180 | 178 | 155 | 105.9524 | 92.2619  |
| 605 | 15.125 | 137 | 180 | 180 | 155 | 107.1429 | 92.2619  |
| 606 | 15.15  | 143 | 180 | 180 | 155 | 107.1429 | 92.2619  |
| 607 | 15.175 | 143 | 180 | 180 | 155 | 107.1429 | 92.2619  |
| 608 | 15.2   | 143 | 180 | 180 | 155 | 107.1429 | 92.2619  |
| 609 | 15.225 | 143 | 180 | 180 | 155 | 107.1429 | 92.2619  |
| 610 | 15.25  | 160 | 180 | 180 | 155 | 107.1429 | 92.2619  |
| 611 | 15.275 | 160 | 180 | 180 | 155 | 107.1429 | 92.2619  |
| 612 | 15.3   | 166 | 180 | 180 | 155 | 107.1429 | 92.2619  |
| 613 | 15.325 | 173 | 180 | 180 | 155 | 107.1429 | 92.2619  |
| 614 | 15.35  | 176 | 180 | 180 | 155 | 107.1429 | 92.2619  |
| 615 | 15.375 | 180 | 166 | 180 | 155 | 107.1429 | 92.2619  |
| 616 | 15.4   | 180 | 160 | 178 | 156 | 105.9524 | 92.85714 |
| 617 | 15.425 | 180 | 152 | 175 | 157 | 104.1667 | 93.45238 |
| 618 | 15.45  | 180 | 148 | 172 | 158 | 102.381  | 94.04762 |
| 619 | 15.475 | 180 | 138 | 168 | 161 | 100      | 95.83333 |
| 620 | 15.5   | 180 | 138 | 165 | 163 | 98.21429 | 97.02381 |
| 621 | 15.525 | 180 | 138 | 163 | 165 | 97.02381 | 98.21429 |
| 622 | 15.55  | 180 | 138 | 161 | 168 | 95.83333 | 100      |
| 623 | 15.575 | 180 | 138 | 158 | 172 | 94.04762 | 102.381  |
| 624 | 15.6   | 180 | 134 | 157 | 175 | 93.45238 | 104.1667 |
| 625 | 15.625 | 180 | 130 | 156 | 178 | 92.85714 | 105.9524 |
| 626 | 15.65  | 180 | 126 | 155 | 180 | 92.2619  | 107.1429 |
| 627 | 15.675 | 180 | 124 | 155 | 180 | 92.2619  | 107.1429 |
| 628 | 15.7   | 180 | 126 | 155 | 180 | 92.2619  | 107.1429 |
| 629 | 15.725 | 180 | 134 | 155 | 180 | 92.2619  | 107.1429 |
| 630 | 15.75  | 180 | 136 | 155 | 180 | 92.2619  | 107.1429 |
| 631 | 15.775 | 180 | 143 | 155 | 180 | 92.2619  | 107.1429 |
| 632 | 15.8   | 180 | 143 | 155 | 180 | 92.2619  | 107.1429 |
| 633 | 15.825 | 180 | 143 | 155 | 180 | 92.2619  | 107.1429 |
| 634 | 15.85  | 180 | 143 | 155 | 180 | 92.2619  | 107.1429 |
| 635 | 15.875 | 180 | 150 | 155 | 180 | 92.2619  | 107.1429 |
| 636 | 15.9   | 180 | 150 | 155 | 180 | 92.2619  | 107.1429 |
| 637 | 15.925 | 180 | 158 | 155 | 178 | 92.2619  | 105.9524 |
| 638 | 15.95  | 180 | 172 | 155 | 175 | 92.2619  | 104.1667 |
| 639 | 15.975 | 180 | 180 | 155 | 172 | 92.2619  | 102.381  |
| 640 | 16     | 180 | 180 | 155 | 168 | 92.2619  | 100      |
| 641 | 16.025 | 180 | 180 | 155 | 165 | 92.2619  | 98.21429 |

|     |        |     |     |     |     |          |          |
|-----|--------|-----|-----|-----|-----|----------|----------|
| 642 | 16.05  | 180 | 180 | 155 | 163 | 92.2619  | 97.02381 |
| 643 | 16.075 | 180 | 180 | 155 | 161 | 92.2619  | 95.83333 |
| 644 | 16.1   | 180 | 180 | 155 | 158 | 92.2619  | 94.04762 |
| 645 | 16.125 | 180 | 180 | 155 | 157 | 92.2619  | 93.45238 |
| 646 | 16.15  | 180 | 180 | 155 | 156 | 92.2619  | 92.85714 |
| 647 | 16.175 | 180 | 180 | 155 | 155 | 92.2619  | 92.2619  |
| 648 | 16.2   | 166 | 180 | 156 | 155 | 92.85714 | 92.2619  |
| 649 | 16.225 | 160 | 180 | 157 | 155 | 93.45238 | 92.2619  |
| 650 | 16.25  | 152 | 180 | 158 | 155 | 94.04762 | 92.2619  |
| 651 | 16.275 | 148 | 180 | 161 | 155 | 95.83333 | 92.2619  |
| 652 | 16.3   | 138 | 180 | 163 | 155 | 97.02381 | 92.2619  |
| 653 | 16.325 | 138 | 180 | 165 | 155 | 98.21429 | 92.2619  |
| 654 | 16.35  | 138 | 180 | 168 | 155 | 100      | 92.2619  |
| 655 | 16.375 | 138 | 180 | 172 | 155 | 102.381  | 92.2619  |
| 656 | 16.4   | 138 | 180 | 175 | 155 | 104.1667 | 92.2619  |
| 657 | 16.425 | 134 | 180 | 178 | 155 | 105.9524 | 92.2619  |
| 658 | 16.45  | 130 | 180 | 180 | 155 | 107.1429 | 92.2619  |
| 659 | 16.475 | 126 | 180 | 180 | 155 | 107.1429 | 92.2619  |
| 660 | 16.5   | 124 | 180 | 180 | 155 | 107.1429 | 92.2619  |
| 661 | 16.525 | 126 | 180 | 180 | 155 | 107.1429 | 92.2619  |
| 662 | 16.55  | 134 | 180 | 180 | 155 | 107.1429 | 92.2619  |
| 663 | 16.575 | 136 | 180 | 180 | 155 | 107.1429 | 92.2619  |
| 664 | 16.6   | 143 | 180 | 180 | 155 | 107.1429 | 92.2619  |
| 665 | 16.625 | 143 | 180 | 180 | 155 | 107.1429 | 92.2619  |
| 666 | 16.65  | 143 | 180 | 180 | 155 | 107.1429 | 92.2619  |
| 667 | 16.675 | 143 | 180 | 180 | 155 | 107.1429 | 92.2619  |
| 668 | 16.7   | 150 | 180 | 180 | 155 | 107.1429 | 92.2619  |
| 669 | 16.725 | 150 | 180 | 178 | 156 | 105.9524 | 92.85714 |
| 670 | 16.75  | 158 | 180 | 175 | 157 | 104.1667 | 93.45238 |
| 671 | 16.775 | 172 | 180 | 172 | 158 | 102.381  | 94.04762 |
| 672 | 16.8   | 180 | 166 | 168 | 161 | 100      | 95.83333 |
| 673 | 16.825 | 180 | 162 | 165 | 163 | 98.21429 | 97.02381 |
| 674 | 16.85  | 180 | 156 | 163 | 165 | 97.02381 | 98.21429 |
| 675 | 16.875 | 180 | 150 | 161 | 168 | 95.83333 | 100      |
| 676 | 16.9   | 180 | 138 | 158 | 172 | 94.04762 | 102.381  |
| 677 | 16.925 | 180 | 130 | 157 | 175 | 93.45238 | 104.1667 |
| 678 | 16.95  | 180 | 128 | 156 | 178 | 92.85714 | 105.9524 |
| 679 | 16.975 | 180 | 128 | 155 | 180 | 92.2619  | 107.1429 |
| 680 | 17     | 180 | 128 | 155 | 180 | 92.2619  | 107.1429 |
| 681 | 17.025 | 180 | 128 | 155 | 180 | 92.2619  | 107.1429 |
| 682 | 17.05  | 180 | 125 | 155 | 180 | 92.2619  | 107.1429 |
| 683 | 17.075 | 180 | 124 | 155 | 180 | 92.2619  | 107.1429 |
| 684 | 17.1   | 180 | 130 | 155 | 180 | 92.2619  | 107.1429 |
| 685 | 17.125 | 180 | 134 | 155 | 180 | 92.2619  | 107.1429 |
| 686 | 17.15  | 180 | 134 | 155 | 180 | 92.2619  | 107.1429 |
| 687 | 17.175 | 180 | 148 | 155 | 180 | 92.2619  | 107.1429 |

|     |        |     |     |     |     |          |          |
|-----|--------|-----|-----|-----|-----|----------|----------|
| 688 | 17.2   | 180 | 157 | 155 | 180 | 92.2619  | 107.1429 |
| 689 | 17.225 | 180 | 157 | 155 | 180 | 92.2619  | 107.1429 |
| 690 | 17.25  | 180 | 157 | 155 | 178 | 92.2619  | 105.9524 |
| 691 | 17.275 | 180 | 157 | 155 | 175 | 92.2619  | 104.1667 |
| 692 | 17.3   | 180 | 157 | 155 | 172 | 92.2619  | 102.381  |
| 693 | 17.325 | 180 | 157 | 155 | 168 | 92.2619  | 100      |
| 694 | 17.35  | 180 | 167 | 155 | 165 | 92.2619  | 98.21429 |
| 695 | 17.375 | 180 | 173 | 155 | 163 | 92.2619  | 97.02381 |
| 696 | 17.4   | 180 | 180 | 155 | 161 | 92.2619  | 95.83333 |
| 697 | 17.425 | 180 | 180 | 155 | 158 | 92.2619  | 94.04762 |
| 698 | 17.45  | 180 | 180 | 155 | 157 | 92.2619  | 93.45238 |
| 699 | 17.475 | 180 | 180 | 155 | 156 | 92.2619  | 92.85714 |
| 700 | 17.5   | 180 | 180 | 155 | 155 | 92.2619  | 92.2619  |
| 701 | 17.525 | 180 | 180 | 156 | 155 | 92.85714 | 92.2619  |
| 702 | 17.55  | 180 | 180 | 157 | 155 | 93.45238 | 92.2619  |
| 703 | 17.575 | 180 | 180 | 158 | 155 | 94.04762 | 92.2619  |
| 704 | 17.6   | 180 | 180 | 161 | 155 | 95.83333 | 92.2619  |
| 705 | 17.625 | 180 | 180 | 163 | 155 | 97.02381 | 92.2619  |
| 706 | 17.65  | 180 | 180 | 165 | 155 | 98.21429 | 92.2619  |
| 707 | 17.675 | 166 | 180 | 168 | 155 | 100      | 92.2619  |
| 708 | 17.7   | 162 | 180 | 172 | 155 | 102.381  | 92.2619  |
| 709 | 17.725 | 156 | 180 | 175 | 155 | 104.1667 | 92.2619  |
| 710 | 17.75  | 150 | 180 | 178 | 155 | 105.9524 | 92.2619  |
| 711 | 17.775 | 138 | 180 | 180 | 155 | 107.1429 | 92.2619  |
| 712 | 17.8   | 130 | 180 | 180 | 155 | 107.1429 | 92.2619  |
| 713 | 17.825 | 128 | 180 | 180 | 155 | 107.1429 | 92.2619  |
| 714 | 17.85  | 128 | 180 | 180 | 155 | 107.1429 | 92.2619  |
| 715 | 17.875 | 128 | 180 | 180 | 155 | 107.1429 | 92.2619  |
| 716 | 17.9   | 128 | 180 | 180 | 155 | 107.1429 | 92.2619  |
| 717 | 17.925 | 125 | 180 | 180 | 155 | 107.1429 | 92.2619  |
| 718 | 17.95  | 124 | 180 | 180 | 155 | 107.1429 | 92.2619  |
| 719 | 17.975 | 130 | 180 | 180 | 155 | 107.1429 | 92.2619  |
| 720 | 18     | 134 | 180 | 180 | 155 | 107.1429 | 92.2619  |
| 721 | 18.025 | 134 | 180 | 180 | 155 | 107.1429 | 92.2619  |
| 722 | 18.05  | 148 | 180 | 178 | 156 | 105.9524 | 92.85714 |
| 723 | 18.075 | 157 | 180 | 175 | 157 | 104.1667 | 93.45238 |
| 724 | 18.1   | 157 | 180 | 172 | 158 | 102.381  | 94.04762 |
| 725 | 18.125 | 157 | 180 | 168 | 161 | 100      | 95.83333 |
| 726 | 18.15  | 157 | 180 | 165 | 163 | 98.21429 | 97.02381 |
| 727 | 18.175 | 157 | 180 | 163 | 165 | 97.02381 | 98.21429 |
| 728 | 18.2   | 157 | 180 | 161 | 168 | 95.83333 | 100      |
| 729 | 18.225 | 167 | 180 | 158 | 172 | 94.04762 | 102.381  |
| 730 | 18.25  | 173 | 180 | 157 | 175 | 93.45238 | 104.1667 |
| 731 | 18.275 | 180 | 151 | 156 | 178 | 92.85714 | 105.9524 |
| 732 | 18.3   | 180 | 142 | 155 | 180 | 92.2619  | 107.1429 |
| 733 | 18.325 | 180 | 135 | 155 | 180 | 92.2619  | 107.1429 |



|     |        |     |     |     |     |          |          |
|-----|--------|-----|-----|-----|-----|----------|----------|
| 734 | 18.35  | 180 | 128 | 155 | 180 | 92.2619  | 107.1429 |
| 735 | 18.375 | 180 | 125 | 155 | 180 | 92.2619  | 107.1429 |
| 736 | 18.4   | 180 | 125 | 155 | 180 | 92.2619  | 107.1429 |
| 737 | 18.425 | 180 | 124 | 155 | 180 | 92.2619  | 107.1429 |
| 738 | 18.45  | 180 | 125 | 155 | 180 | 92.2619  | 107.1429 |
| 739 | 18.475 | 180 | 125 | 155 | 180 | 92.2619  | 107.1429 |
| 740 | 18.5   | 180 | 125 | 155 | 180 | 92.2619  | 107.1429 |
| 741 | 18.525 | 180 | 125 | 155 | 180 | 92.2619  | 107.1429 |
| 742 | 18.55  | 180 | 125 | 155 | 180 | 92.2619  | 107.1429 |
| 743 | 18.575 | 180 | 130 | 155 | 178 | 92.2619  | 105.9524 |
| 744 | 18.6   | 180 | 131 | 155 | 175 | 92.2619  | 104.1667 |
| 745 | 18.625 | 180 | 140 | 155 | 172 | 92.2619  | 102.381  |
| 746 | 18.65  | 180 | 147 | 155 | 168 | 92.2619  | 100      |
| 747 | 18.675 | 180 | 160 | 155 | 165 | 92.2619  | 98.21429 |
| 748 | 18.7   | 180 | 171 | 155 | 163 | 92.2619  | 97.02381 |
| 749 | 18.725 | 180 | 177 | 155 | 161 | 92.2619  | 95.83333 |
| 750 | 18.75  | 180 | 180 | 155 | 158 | 92.2619  | 94.04762 |
| 751 | 18.775 | 180 | 180 | 155 | 157 | 92.2619  | 93.45238 |
| 752 | 18.8   | 180 | 180 | 155 | 156 | 92.2619  | 92.85714 |
| 753 | 18.825 | 180 | 180 | 155 | 155 | 92.2619  | 92.2619  |
| 754 | 18.85  | 180 | 180 | 156 | 155 | 92.85714 | 92.2619  |
| 755 | 18.875 | 180 | 180 | 157 | 155 | 93.45238 | 92.2619  |
| 756 | 18.9   | 180 | 180 | 158 | 155 | 94.04762 | 92.2619  |
| 757 | 18.925 | 180 | 180 | 161 | 155 | 95.83333 | 92.2619  |
| 758 | 18.95  | 180 | 180 | 163 | 155 | 97.02381 | 92.2619  |
| 759 | 18.975 | 180 | 180 | 165 | 155 | 98.21429 | 92.2619  |
| 760 | 19     | 180 | 180 | 168 | 155 | 100      | 92.2619  |
| 761 | 19.025 | 180 | 180 | 172 | 155 | 102.381  | 92.2619  |
| 762 | 19.05  | 180 | 180 | 175 | 155 | 104.1667 | 92.2619  |
| 763 | 19.075 | 180 | 180 | 178 | 155 | 105.9524 | 92.2619  |
| 764 | 19.1   | 180 | 180 | 180 | 155 | 107.1429 | 92.2619  |
| 765 | 19.125 | 180 | 180 | 180 | 155 | 107.1429 | 92.2619  |
| 766 | 19.15  | 151 | 180 | 180 | 155 | 107.1429 | 92.2619  |
| 767 | 19.175 | 142 | 180 | 180 | 155 | 107.1429 | 92.2619  |
| 768 | 19.2   | 135 | 180 | 180 | 155 | 107.1429 | 92.2619  |
| 769 | 19.225 | 128 | 180 | 180 | 155 | 107.1429 | 92.2619  |
| 770 | 19.25  | 125 | 180 | 180 | 155 | 107.1429 | 92.2619  |
| 771 | 19.275 | 125 | 180 | 180 | 155 | 107.1429 | 92.2619  |
| 772 | 19.3   | 124 | 180 | 180 | 155 | 107.1429 | 92.2619  |
| 773 | 19.325 | 125 | 180 | 180 | 155 | 107.1429 | 92.2619  |
| 774 | 19.35  | 125 | 180 | 180 | 155 | 107.1429 | 92.2619  |
| 775 | 19.375 | 125 | 180 | 178 | 156 | 105.9524 | 92.85714 |
| 776 | 19.4   | 125 | 180 | 175 | 157 | 104.1667 | 93.45238 |
| 777 | 19.425 | 125 | 180 | 172 | 158 | 102.381  | 94.04762 |
| 778 | 19.45  | 130 | 180 | 168 | 161 | 100      | 95.83333 |
| 779 | 19.475 | 131 | 180 | 165 | 163 | 98.21429 | 97.02381 |

|     |        |     |     |     |     |          |          |
|-----|--------|-----|-----|-----|-----|----------|----------|
| 780 | 19.5   | 140 | 180 | 163 | 165 | 97.02381 | 98.21429 |
| 781 | 19.525 | 147 | 180 | 161 | 168 | 95.83333 | 100      |
| 782 | 19.55  | 160 | 180 | 158 | 172 | 94.04762 | 102.381  |
| 783 | 19.575 | 171 | 180 | 157 | 175 | 93.45238 | 104.1667 |
| 784 | 19.6   | 177 | 180 | 156 | 178 | 92.85714 | 105.9524 |
| 785 | 19.625 | 180 | 158 | 155 | 180 | 92.2619  | 107.1429 |
| 786 | 19.65  | 180 | 125 | 155 | 180 | 92.2619  | 107.1429 |
| 787 | 19.675 | 180 | 150 | 155 | 180 | 92.2619  | 107.1429 |
| 788 | 19.7   | 180 | 145 | 155 | 180 | 92.2619  | 107.1429 |
| 789 | 19.725 | 180 | 142 | 155 | 180 | 92.2619  | 107.1429 |
| 790 | 19.75  | 180 | 132 | 155 | 180 | 92.2619  | 107.1429 |
| 791 | 19.775 | 180 | 128 | 155 | 180 | 92.2619  | 107.1429 |
| 792 | 19.8   | 180 | 128 | 155 | 180 | 92.2619  | 107.1429 |
| 793 | 19.825 | 180 | 126 | 155 | 180 | 92.2619  | 107.1429 |
| 794 | 19.85  | 180 | 125 | 155 | 180 | 92.2619  | 107.1429 |
| 795 | 19.875 | 180 | 128 | 155 | 180 | 92.2619  | 107.1429 |
| 796 | 19.9   | 180 | 130 | 155 | 178 | 92.2619  | 105.9524 |
| 797 | 19.925 | 180 | 135 | 155 | 175 | 92.2619  | 104.1667 |
| 798 | 19.95  | 180 | 135 | 155 | 172 | 92.2619  | 102.381  |
| 799 | 19.975 | 180 | 142 | 155 | 168 | 92.2619  | 100      |
| 800 | 20     | 180 | 152 | 155 | 178 | 92.2619  | 105.9524 |

**Afflicted Subject 1**

| Time (s) | Frame no | Right knee | Right hip | Right ankle | Left knee | Left hip | Left ankle |
|----------|----------|------------|-----------|-------------|-----------|----------|------------|
| 0.05     | 1        | 175        | 172       | 88.13       | 174       | 152      | 77.94      |
| 0.1      | 2        | 174        | 168       | 86.08       | 173       | 152      | 77.94      |
| 0.15     | 3        | 170        | 160       | 81.98       | 175       | 152      | 77.94      |
| 0.2      | 4        | 165        | 155       | 79.42       | 175       | 152      | 77.94      |
| 0.25     | 5        | 161        | 154       | 78.91       | 175       | 155      | 79.47      |
| 0.3      | 6        | 158        | 153       | 78.4        | 175       | 156      | 79.99      |
| 0.35     | 7        | 155        | 152       | 77.88       | 174       | 158      | 81.01      |
| 0.4      | 8        | 152        | 150       | 76.86       | 174       | 160      | 82.04      |
| 0.45     | 9        | 150        | 150       | 76.86       | 171       | 161      | 82.55      |
| 0.5      | 10       | 148        | 148       | 75.83       | 170       | 164      | 84.09      |
| 0.55     | 11       | 146        | 147       | 75.32       | 165       | 166      | 85.11      |
| 0.6      | 12       | 142        | 147       | 75.32       | 160       | 168      | 86.14      |
| 0.65     | 13       | 140        | 145       | 74.3        | 155       | 170      | 87.17      |
| 0.7      | 14       | 136        | 145       | 74.3        | 147       | 172      | 88.19      |
| 0.75     | 15       | 130        | 148       | 75.83       | 132       | 175      | 89.73      |
| 0.8      | 16       | 123        | 150       | 76.86       | 137       | 178      | 91.27      |
| 0.85     | 17       | 132        | 151       | 77.37       | 140       | 178      | 91.27      |
| 0.9      | 18       | 137        | 151       | 77.37       | 149       | 178      | 91.27      |
| 0.95     | 19       | 144        | 153       | 78.4        | 155       | 173      | 88.7       |
| 1        | 20       | 148        | 155       | 79.42       | 163       | 168      | 86.14      |
| 1.05     | 21       | 151        | 159       | 81.47       | 165       | 165      | 84.6       |
| 1.1      | 22       | 155        | 163       | 83.52       | 167       | 162      | 83.06      |
| 1.15     | 23       | 157        | 170       | 87.11       | 170       | 158      | 81.01      |
| 1.2      | 24       | 159        | 176       | 90.18       | 171       | 156      | 79.99      |
| 1.25     | 25       | 160        | 178       | 91.21       | 172       | 155      | 79.47      |
| 1.3      | 26       | 165        | 178       | 91.21       | 173       | 154      | 78.96      |
| 1.35     | 27       | 169        | 176       | 90.18       | 174       | 153      | 78.45      |
| 1.4      | 28       | 173        | 176       | 90.18       | 175       | 152      | 77.94      |
| 1.45     | 29       | 175        | 174       | 89.16       | 177       | 152      | 77.94      |
| 1.5      | 30       | 177        | 174       | 89.16       | 178       | 152      | 77.94      |
| 1.55     | 31       | 177        | 172       | 88.13       | 178       | 152      | 77.94      |
| 1.6      | 32       | 177        | 170       | 87.11       | 178       | 152      | 77.94      |
| 1.65     | 33       | 177        | 170       | 87.11       | 178       | 152      | 77.94      |
| 1.7      | 34       | 177        | 170       | 87.11       | 178       | 152      | 77.94      |

**Afflicted Subject 2**

| Time (s) | Frame no | Right knee | Right hip | Right ankle | Left knee | Left hip | Left ankle |
|----------|----------|------------|-----------|-------------|-----------|----------|------------|
| 0.05     | 1        | 174        | 175       | 98.83       | 179       | 177      | 107.5      |
| 0.1      | 2        | 173        | 175       | 98.83       | 175       | 171      | 103.86     |
| 0.15     | 3        | 173        | 174       | 98.26       | 162       | 164      | 99.6       |
| 0.2      | 4        | 168        | 172       | 97.13       | 161       | 163      | 99         |
| 0.25     | 5        | 163        | 164       | 92.61       | 160       | 158      | 95.96      |
| 0.3      | 6        | 155        | 158       | 89.23       | 159       | 157      | 95.35      |
| 0.35     | 7        | 154        | 157       | 88.66       | 158       | 155      | 94.14      |
| 0.4      | 8        | 153        | 141       | 79.63       | 157       | 154      | 93.53      |
| 0.45     | 9        | 147        | 138       | 77.93       | 156       | 150      | 91.1       |
| 0.5      | 10       | 143        | 139       | 78.5        | 151       | 148      | 89.89      |
| 0.55     | 11       | 143        | 139       | 78.5        | 150       | 145      | 88.07      |
| 0.6      | 12       | 144        | 139       | 78.5        | 149       | 143      | 86.85      |
| 0.65     | 13       | 147        | 145       | 81.88       | 148       | 140      | 85.03      |
| 0.7      | 14       | 150        | 146       | 82.45       | 145       | 138      | 83.81      |
| 0.75     | 15       | 148        | 148       | 83.58       | 137       | 135      | 81.99      |
| 0.8      | 16       | 151        | 147       | 83.01       | 135       | 133      | 80.78      |
| 0.85     | 17       | 148        | 146       | 82.45       | 134       | 133      | 80.78      |
| 0.9      | 18       | 153        | 145       | 81.88       | 133       | 134      | 81.38      |
| 0.95     | 19       | 153        | 144       | 81.32       | 132       | 135      | 81.99      |
| 1        | 20       | 158        | 154       | 86.97       | 131       | 137      | 83.21      |
| 1.05     | 21       | 167        | 155       | 87.53       | 127       | 140      | 85.03      |
| 1.1      | 22       | 163        | 159       | 89.79       | 130       | 142      | 86.24      |
| 1.15     | 23       | 165        | 159       | 89.79       | 133       | 145      | 88.07      |
| 1.2      | 24       | 160        | 160       | 90.36       | 134       | 146      | 88.67      |
| 1.25     | 25       | 159        | 160       | 90.36       | 137       | 148      | 89.89      |
| 1.3      | 26       | 158        | 162       | 91.49       | 138       | 150      | 91.1       |
| 1.35     | 27       | 158        | 162       | 91.49       | 140       | 151      | 91.71      |
| 1.4      | 28       | 160        | 162       | 91.49       | 142       | 153      | 92.92      |
| 1.45     | 29       | 163        | 157       | 88.66       | 144       | 155      | 94.14      |
| 1.5      | 30       | 161        | 157       | 88.66       | 145       | 159      | 96.57      |
| 1.55     | 31       | 160        | 157       | 88.66       | 148       | 161      | 97.78      |
| 1.6      | 32       | 149        | 144       | 81.32       | 149       | 163      | 99         |
| 1.65     | 33       | 138        | 137       | 77.37       | 150       | 164      | 99.6       |
| 1.7      | 34       | 136        | 135       | 76.24       | 151       | 165      | 100.21     |
| 1.75     | 35       | 136        | 134       | 75.67       | 153       | 166      | 100.82     |
| 1.8      | 36       | 135        | 125       | 70.59       | 155       | 166      | 100.82     |
| 1.85     | 37       | 135        | 134       | 75.67       | 158       | 167      | 101.43     |
| 1.9      | 38       | 135        | 135       | 76.24       | 160       | 167      | 101.43     |
| 1.95     | 39       | 138        | 136       | 76.8        | 162       | 168      | 102.03     |
| 2        | 40       | 151        | 143       | 80.76       | 163       | 168      | 102.03     |
| 2.05     | 41       | 157        | 153       | 86.4        | 168       | 170      | 103.25     |
| 2.1      | 42       | 161        | 154       | 86.97       | 170       | 171      | 103.86     |
| 2.15     | 43       | 161        | 155       | 87.53       | 172       | 172      | 104.46     |

|      |    |     |     |       |     |     |        |
|------|----|-----|-----|-------|-----|-----|--------|
| 2.2  | 44 | 160 | 155 | 87.53 | 174 | 175 | 106.29 |
| 2.25 | 45 | 158 | 155 | 87.53 | 179 | 178 | 108.11 |
| 2.3  | 46 | 158 | 157 | 88.66 | 180 | 178 | 108.11 |
| 2.35 | 47 | 159 | 158 | 89.23 | 180 | 178 | 108.11 |
| 2.4  | 48 | 163 | 162 | 91.49 | 180 | 178 | 108.11 |
| 2.45 | 49 | 164 | 162 | 91.49 | 180 | 178 | 108.11 |

**Afflicted Subject 3**

| Time (s) | Frame no | Right knee | Right hip | Right ankle | Left knee | Left hip | Left ankle |
|----------|----------|------------|-----------|-------------|-----------|----------|------------|
| 0.05     | 1        | 180        | 172       | 111         | 180       | 179      | 111.6      |
| 0.1      | 2        | 180        | 171       | 110.36      | 180       | 177      | 110.35     |
| 0.15     | 3        | 180        | 169       | 109.07      | 180       | 176      | 109.73     |
| 0.2      | 4        | 180        | 168       | 108.42      | 180       | 172      | 107.24     |
| 0.25     | 5        | 180        | 166       | 107.13      | 180       | 171      | 106.61     |
| 0.3      | 6        | 178        | 162       | 104.55      | 178       | 170      | 105.99     |
| 0.35     | 7        | 174        | 160       | 103.26      | 176       | 169      | 105.36     |
| 0.4      | 8        | 170        | 157       | 101.32      | 174       | 168      | 104.74     |
| 0.45     | 9        | 163        | 154       | 99.39       | 172       | 166      | 103.49     |
| 0.5      | 10       | 161        | 150       | 96.8        | 168       | 164      | 102.25     |
| 0.55     | 11       | 155        | 145       | 93.58       | 164       | 162      | 101        |
| 0.6      | 12       | 152        | 141       | 91          | 161       | 160      | 99.75      |
| 0.65     | 13       | 147        | 139       | 89.7        | 157       | 155      | 96.64      |
| 0.7      | 14       | 145        | 134       | 86.48       | 153       | 152      | 94.77      |
| 0.75     | 15       | 139        | 128       | 82.61       | 151       | 150      | 93.52      |
| 0.8      | 16       | 143        | 125       | 80.67       | 148       | 148      | 92.27      |
| 0.85     | 17       | 146        | 122       | 78.73       | 139       | 144      | 89.78      |
| 0.9      | 18       | 150        | 134       | 86.48       | 132       | 136      | 84.79      |
| 0.95     | 19       | 152        | 144       | 92.93       | 134       | 134      | 83.54      |
| 1        | 20       | 158        | 150       | 96.8        | 142       | 128      | 79.8       |
| 1.05     | 21       | 160        | 166       | 107.13      | 150       | 125      | 77.93      |
| 1.1      | 22       | 162        | 162       | 104.55      | 152       | 122      | 76.06      |
| 1.15     | 23       | 164        | 160       | 103.26      | 155       | 135      | 84.17      |
| 1.2      | 24       | 165        | 164       | 105.84      | 160       | 142      | 88.53      |
| 1.25     | 25       | 168        | 166       | 107.13      | 165       | 150      | 93.52      |
| 1.3      | 26       | 174        | 169       | 109.07      | 168       | 155      | 96.64      |
| 1.35     | 27       | 175        | 171       | 110.36      | 170       | 158      | 98.51      |
| 1.4      | 28       | 177        | 170       | 109.71      | 172       | 162      | 101        |
| 1.45     | 29       | 179        | 172       | 111         | 175       | 168      | 104.74     |
| 1.5      | 30       | 179        | 176       | 113.58      | 176       | 172      | 107.24     |
| 1.55     | 31       | 180        | 177       | 114.23      | 177       | 175      | 109.11     |
| 1.6      | 32       | 180        | 179       | 115.52      | 177       | 179      | 111.6      |
| 1.65     | 33       | 180        | 179       | 115.52      | 177       | 179      | 111.6      |
| 1.7      | 34       | 180        | 179       | 115.52      | 177       | 179      | 111.6      |

**Afflicted Subject 4**

| Time (s) | Frame no | Right knee | Right hip | Right ankle | Left knee | Left hip | Left ankle |
|----------|----------|------------|-----------|-------------|-----------|----------|------------|
| 0.05     | 1        | 179        | 175       | 87.73       | 180       | 177      | 88.52      |
| 0.1      | 2        | 179        | 171       | 85.72       | 180       | 177      | 88.52      |
| 0.15     | 3        | 175        | 168       | 84.22       | 177       | 177      | 88.52      |
| 0.2      | 4        | 171        | 165       | 82.71       | 175       | 177      | 88.52      |
| 0.25     | 5        | 168        | 162       | 81.21       | 170       | 175      | 87.52      |
| 0.3      | 6        | 164        | 158       | 79.2        | 168       | 173      | 86.52      |
| 0.35     | 7        | 163        | 155       | 77.7        | 165       | 169      | 84.52      |
| 0.4      | 8        | 158        | 150       | 75.19       | 160       | 167      | 83.52      |
| 0.45     | 9        | 153        | 147       | 73.69       | 157       | 160      | 80.02      |
| 0.5      | 10       | 151        | 141       | 70.68       | 155       | 157      | 78.51      |
| 0.55     | 11       | 146        | 140       | 70.18       | 151       | 155      | 77.51      |
| 0.6      | 12       | 143        | 138       | 69.18       | 148       | 150      | 75.01      |
| 0.65     | 13       | 138        | 135       | 67.67       | 145       | 146      | 73.01      |
| 0.7      | 14       | 132        | 131       | 65.67       | 142       | 144      | 72.01      |
| 0.75     | 15       | 130        | 129       | 64.67       | 140       | 142      | 71.01      |
| 0.8      | 16       | 137        | 135       | 67.67       | 137       | 135      | 67.51      |
| 0.85     | 17       | 141        | 139       | 69.68       | 140       | 137      | 68.51      |
| 0.9      | 18       | 150        | 143       | 71.69       | 147       | 140      | 70.01      |
| 0.95     | 19       | 155        | 147       | 73.69       | 151       | 144      | 72.01      |
| 1        | 20       | 163        | 150       | 75.19       | 152       | 147      | 73.51      |
| 1.05     | 21       | 165        | 151       | 75.7        | 154       | 149      | 74.51      |
| 1.1      | 22       | 166        | 155       | 77.7        | 157       | 151      | 75.51      |
| 1.15     | 23       | 167        | 158       | 79.2        | 159       | 156      | 78.01      |
| 1.2      | 24       | 170        | 162       | 81.21       | 162       | 160      | 80.02      |
| 1.25     | 25       | 171        | 165       | 82.71       | 165       | 162      | 81.02      |
| 1.3      | 26       | 172        | 167       | 83.72       | 169       | 165      | 82.52      |
| 1.35     | 27       | 174        | 170       | 85.22       | 172       | 169      | 84.52      |
| 1.4      | 28       | 175        | 174       | 87.23       | 176       | 170      | 85.02      |
| 1.45     | 29       | 177        | 177       | 88.73       | 178       | 178      | 89.02      |
| 1.5      | 30       | 179        | 177       | 88.73       | 178       | 178      | 89.02      |
| 1.55     | 31       | 179        | 177       | 88.73       | 178       | 178      | 89.02      |
| 1.6      | 32       | 179        | 177       | 88.73       | 178       | 178      | 89.02      |
